# Supplementary material for: Bacterial Community Composition and Extracellular Enzyme Activity in Temperate Streambed Sediment during Drying and Rewetting
Source: PubMed Central journal article supplement (PMC3873959; doi:10.1371/journal.pone.0083365), 2013-12-27
Supplement: pone.0083365.s001.pdf [file pone.0083365.s001.pdf]

**Table S1.** Oligonucleotide probes used for bacterial community analysis via CARD-FISH.

| Taxon                                                | Name                   | Sequence (5'-3')   | Reference |
|------------------------------------------------------|------------------------|--------------------|-----------|
| <i>Bacteria</i>                                      | S-D-Bact-0338-a-A-18   | GCTGCCTCCCGTAGGAGT | [1]       |
| <i>Alphaproteobacteria</i>                           | S-Sc-aProt-0019-a-A-17 | CGTTCGYTCTGAGCCAG  | [2]       |
| <i>Betaproteobacteria</i>                            | L-Sc-bProt-1027-a-A-17 | GCCTTCCCACCTTCGTTT | [2]       |
| <i>Gammaproteobacteria</i>                           | L-Sc-gProt-1027-a-A-17 | GCCTTCCCACATCGTTT  | [2]       |
| <i>Bacteroidetes (Cytophaga-Flavobacteria group)</i> | S-P-CyFla-0319-a-A-18  | TGGTCCGTGTVAGTAG   | [3]       |
| <i>Actinobacteria</i>                                | L-P-Grps-1901-a-A-18   | TATAGTTACCACCGCCGT | [4,5]     |
| <i>Firmicutes</i>                                    | LGC354B                | CGGAAGATTCCCTACTGC | [6]       |

The probes were 5'-aminolinked oligonucleotides labelled with horseradish peroxidase.

## References

1. Amann R, Krumholz L, Stahl DA (1990) Fluorescent-oligonucleotide probing of whole cells for determinative, phylogenetic, and environmental studies in microbiology. *Journal of Bacteriology* 172: 762-770.
2. Manz W, Amann RI, Ludwig W, Wagner M, Schleifer KH (1992) Phylogenetic oligonucleotide probes for the major subclasses of proteobacteria: problems and solutions. *Systematic and Applied Microbiology* 15: 593-600.
3. Manz W, Wagner M, Amann R, Schleifer KH (1994) In-situ characterization of the microbial consortia active in 2 waste-water treatment plants. *Water Research* 28: 1715-1723.
4. Berchtold M., Chatzinotas A, Schonhuber W, Brune A, Amann R, et al. (1999) Differential enumeration and in situ localization of microorganisms in the hindgut of the lower termite *Mastotermes darwiniensis* by hybridization with rRNA-targeted probes. *Archives of Microbiology* 172: 407-416.
5. Roller C, Wagner M, Amann R, W. Ludwig, Schleifer KH (1994) In-situ probing of gram-positive bacteria with high DNA G+C content using 23S-ribosomal-RNA-targeted oligonucleotides. *Microbiology-SGM* 140: 2849-2858.
6. Meier H, Amann R, Ludwig R, Schleifer K-H (1999) Specific oligonucleotide probes for in situ detection of a major group of gram-positive bacteria with low DNA G+C content. *Systematic and Applied Microbiology* 186-196.
