# Supplementary material for: Bacterial Community Composition and Extracellular Enzyme Activity in Temperate Streambed Sediment during Drying and Rewetting
Source: PubMed Central journal article supplement (PMC3873959; doi:10.1371/journal.pone.0083365), 2013-12-27
Supplement: pone.0083365.s002.pdf [file pone.0083365.s002.pdf]

**Table S2.** Sediment chemical characteristics: ranges.

|                                        | weeks | fast      | intermediate | slow        |
|----------------------------------------|-------|-----------|--------------|-------------|
| C:N ratio                              | 0     |           | 8.0-9.6      |             |
|                                        | 2     | 7.5-9.9   | 8.1-10.7     | 8.3-10.9    |
|                                        | 4     | 8.3-9.2   | 8.0-9.8      | 8.8-9.8     |
|                                        | 8     | 8.5-9.5   | 8.3-9.9      | 8.4-13.8    |
|                                        | 13    | 8.0-9.6   | 8.3-9.1      | 7.7-10.3    |
| Nitrogen ( $\mu\text{g N g dw}^{-1}$ ) | 0     |           | 1.41-1.86    |             |
|                                        | 2     | 2.16-2.93 | 2.23-3.15    | 4.67-12.45* |
|                                        | 4     | 0.62-2.71 | 2.38-3.19    | 4.51-6.55*  |
|                                        | 8     | 2.24-2.85 | 2.46-2.82    | 5.63-6.45*  |
|                                        | 13    | 2.47-2.96 | 2.39-3.01    | 5.96-7.61*  |
| Nitrate ( $\mu\text{g N g dw}^{-1}$ )  | 0     |           | 1.03-1.32    |             |
|                                        | 2     | 1.96-2.66 | 1.91-2.89    | 3.97-11.22  |
|                                        | 4     | 0.29-2.49 | 2.08-2.95    | 4.07-6.21*  |
|                                        | 8     | 1.86-2.58 | 2.16-2.65    | 5.46-6.26*  |
|                                        | 13    | 2.04-2.34 | 2.02-2.57    | 5.71-7.38*  |
| Ammonium ( $\mu\text{g N g dw}^{-1}$ ) | 0     |           | 0.08-0.62    |             |
|                                        | 2     | 0.04-0.21 | 0.13-0.46    | 0.10-0.50   |
|                                        | 4     | 0.06-0.21 | 0.09-0.20    | 0.12-0.17   |
|                                        | 8     | 0.13-0.23 | 0.08-0.35    | 0.07-0.20   |
|                                        | 13    | 0.33-0.55 | 0.15-0.38    | 0.15-0.17   |

Ranges of C:N ratios, concentrations of nitrogen, nitrate, and ammonium in streambed sediments during different desiccation scenarios (n=4-5). The asterisks indicate significant differences between the treatments (ANOVA, \* =  $P < 0.05$ ).
