# Supplementary material for: Bacterial Community Composition and Extracellular Enzyme Activity in Temperate Streambed Sediment during Drying and Rewetting
Source: PubMed Central journal article supplement (PMC3873959; doi:10.1371/journal.pone.0083365), 2013-12-27
Supplement: pone.0083365.s003.pdf [file pone.0083365.s003.pdf]

**Table S3.** Abundances of prokaryotes in experimentally desiccated Breitenbach streambed sediments: ranges.

|                                                                         | weeks | fast       | intermediate | slow        |
|-------------------------------------------------------------------------|-------|------------|--------------|-------------|
| Prokaryotes<br>(10 <sup>9</sup> cells mL <sup>-1</sup> )                | 0     |            | 2.4-6.0      |             |
|                                                                         | 2     | 0.8-4.0*   | 1.5-3.8*     | 1.1-3.7*    |
|                                                                         | 4     | 3.1-6.2    | 2.9-5.3      | 2.8-6.0     |
|                                                                         | 8     | 1.7-10.8   | 4.4-9.1      | 2.3-7.4     |
|                                                                         | 13    | 0.6-7.0    | 6.1±1.4      | 2.0-9.0     |
| <i>Bacteria</i><br>(10 <sup>9</sup> cells mL <sup>-1</sup> )            | 0     |            | 1.0-1.5      |             |
|                                                                         | 2     | 0.7-2.7    | 0.3-2.3      | 1.7-2.3     |
|                                                                         | 4     | 0.8-1.3    | 0.3-0.8      | 0.5-1.8     |
|                                                                         | 8     | 1.5-1.5    | 1.1-2.3      | 1.5-3.0     |
|                                                                         | 13    | 1.6-1.9    | 1.7-2.7      | 1.1-1.8     |
| <i>Alphaproteobacteria</i><br>(10 <sup>7</sup> cells mL <sup>-1</sup> ) | 0     |            | 2.3-18.5     |             |
|                                                                         | 2     | 13.2-44.9* | 10.3-38.3*   | 7.0-57.8    |
|                                                                         | 4     | 11.9-24.8  | 0.1-58.3     | 0.4-93.5*   |
|                                                                         | 8     | 15.6-45.2* | 0.5-79.9     | 16.5-28.7   |
|                                                                         | 13    | 2.9-26.9   | 21.0-50.6*   | 1.5-33.8*   |
| <i>Betaproteobacteria</i><br>(10 <sup>7</sup> cells mL <sup>-1</sup> )  | 0     |            | 7.8-51.4     |             |
|                                                                         | 2     | 4.5-22.6   | 11.2-19.1    | 3.6-44.0    |
|                                                                         | 4     | 5.3-10.8*  | 3.6-15.6*    | 15.7-31.5   |
|                                                                         | 8     | 2.6-21.9   | 7.2-17.5     | 3.3-19.5    |
|                                                                         | 13    | 16.0-19.1  | 5.7-18.3     | 0.0-20.0    |
| <i>Gammaproteobacteria</i><br>(10 <sup>7</sup> cells mL <sup>-1</sup> ) | 0     |            | 0.0-5.5      |             |
|                                                                         | 2     | 0.0-7.4    | 0.0-10.7     | 0.1-4.6     |
|                                                                         | 4     | 0.4-9.4    | 0.0-6.3      | 0.0-10.2    |
|                                                                         | 8     | 1.9-5.8    | 0.1-7.5      | 0.0-5.3     |
|                                                                         | 13    | 0.0-2.9    | 0.0-1.9      | 1.3-14.1    |
| <i>Bacteroidetes</i><br>(10 <sup>7</sup> cells mL <sup>-1</sup> )       | 0     |            | 1.4-12.8     |             |
|                                                                         | 2     | 0.8-9.4    | 1.6-6.2      | 0.4-9.8     |
|                                                                         | 4     | 0.4-1.9    | 0.4-13.4     | 3.5-7.9     |
|                                                                         | 8     | 0.4-2.1*   | 0.5-5.7      | 0.9-4.0     |
|                                                                         | 13    | 1.4-2.4    | 1.1-5.7      | 0.0-4.8     |
| <i>Actinobacteria</i><br>(10 <sup>7</sup> cells mL <sup>-1</sup> )      | 0     |            | 0.4-5.3      |             |
|                                                                         | 2     | 3.8-37.4   | 4.9-11.9     | 1.3-6.0     |
|                                                                         | 4     | 5.9-13.2*  | 3.5-9.9      | 4.6-11.2*   |
|                                                                         | 8     | 8.5-20.5*  | 17.1-23.4*   | 31.9-48.0** |
|                                                                         | 13    | 10.3-23.9* | 5.9-31.4     | 5.7-32.2*   |
| <i>Firmicutes</i><br>(10 <sup>7</sup> cells mL <sup>-1</sup> )          | 0     |            | 1.0-10.3     |             |
|                                                                         | 2     | 0.0-2.0    | 0.3-3.1      | 0.0-3.6     |
|                                                                         | 4     | 1.9-9.0    | 0.1-5.9      | 0.1-3.5     |
|                                                                         | 8     | 0.0-2.6    | 0.65-8.3     | 0.0-8.7     |
|                                                                         | 13    | 1.5-2.1    | 0.4-3.5      | 0.8-3.1     |

The abundance of prokaryotes was determined after SYBR Green staining whereas the abundances of different taxonomic groups were determined via CARD-FISH (n=4). The asterisks indicate significant differences between wet sediment from day 0 and the treatment samples (ANOVA, \* = P<0.05, \*\* = P< 0.01).
