# Supplementary material for: Bacterial Community Composition and Extracellular Enzyme Activity in Temperate Streambed Sediment during Drying and Rewetting
Source: PubMed Central journal article supplement (PMC3873959; doi:10.1371/journal.pone.0083365), 2013-12-27
Supplement: pone.0083365.s004.pdf [file pone.0083365.s004.pdf]

**Table S4.** Significant differences between the abundances of investigated prokaryotic groups with respect to desiccation time (weeks) and treatment (fast, intermediate and slow desiccation).

|                             |      | Fast |     |     |     |     | Intermediate |     |     |     |     | Slow |     |     |     |     |
|-----------------------------|------|------|-----|-----|-----|-----|--------------|-----|-----|-----|-----|------|-----|-----|-----|-----|
|                             | Week | 0    | 2   | 4   | 8   | 13  | 0            | 2   | 4   | 8   | 13  | 0    | 2   | 4   | 8   | 13  |
| <i>Alphaproteobacteria</i>  | 0    | ---  | *   |     |     |     | ---          | *   |     |     | *   | ---  | *   |     |     |     |
|                             | 2    | *    | --- |     |     |     | *            | --- |     |     |     | *    | --- |     |     |     |
|                             | 4    |      |     | --- |     |     |              |     | --- |     |     |      |     | --- |     |     |
|                             | 8    |      |     |     | --- |     |              |     |     | --- |     |      |     |     | --- |     |
|                             | 13   |      |     |     |     | --- | *            |     |     |     | --- |      |     |     |     | --- |
| <i>Betaproteobacteria</i>   | 0    | ---  |     | *   |     |     | ---          |     |     |     |     | ---  |     |     |     |     |
|                             | 2    |      | --- |     |     |     |              | --- | *   |     |     |      | --- |     |     |     |
|                             | 4    | *    |     | --- |     |     |              | *   | --- |     |     |      |     | --- |     |     |
|                             | 8    |      |     |     | --- |     |              |     |     | --- |     |      |     |     | --- |     |
|                             | 13   |      |     |     |     | --- |              |     |     |     | --- |      |     |     |     | --- |
| <i>Gammaaproteobacteria</i> | 0    | ---  |     |     |     |     | ---          |     |     | **  | **  | ---  |     |     |     |     |
|                             | 2    |      | --- |     |     |     |              | --- |     |     |     |      | --- |     |     |     |
|                             | 4    |      |     | --- |     |     |              |     | --- |     |     |      |     | --- |     |     |
|                             | 8    |      |     |     | --- |     | **           |     |     | --- |     |      |     |     | --- |     |
|                             | 13   |      |     |     |     | --- | **           |     |     |     | --- |      |     |     |     | --- |
| <i>Bacteroidetes</i>        | 0    | ---  |     | *** | *** |     | ---          |     |     |     |     | ---  |     | **  |     |     |
|                             | 2    |      | --- | *   |     |     |              | --- |     | *   |     |      | --- |     |     |     |
|                             | 4    | ***  | *   | --- |     |     |              |     | --- |     |     | **   |     | --- |     |     |
|                             | 8    | ***  |     |     | --- |     |              | *   |     | --- |     |      |     |     | --- |     |
|                             | 13   |      |     |     |     | --- |              |     |     |     | --- |      |     |     |     | --- |
| <i>Actinobacteria</i>       | 0    | ---  |     | *   | *   | *   | ---          |     | *   |     |     | ---  |     | *   | *** | *   |
|                             | 2    |      | --- |     |     |     |              | --- |     |     |     |      | --- | *   |     |     |
|                             | 4    | *    |     | --- |     |     | *            |     | --- | *** |     | *    | *   | --- |     |     |
|                             | 8    | *    |     |     | --- |     |              |     | *** | --- |     | ***  |     |     | --- |     |
|                             | 13   | *    |     |     |     | --- |              |     |     |     | --- | *    |     |     |     | --- |
| <i>Firmicutes</i>           | 0    | ---  | *   | *   |     |     | ---          |     |     |     |     | ---  |     |     |     |     |
|                             | 2    | *    | --- |     |     |     |              | --- |     |     |     |      | --- |     |     |     |
|                             | 4    | *    |     | --- |     |     |              |     | --- |     |     |      |     | --- |     |     |
|                             | 8    |      |     |     | --- |     |              |     |     | --- |     |      |     |     | --- |     |
|                             | 13   |      |     |     |     | --- |              |     |     |     | --- |      |     |     |     | --- |

ANOVA, \* = P<0.05, \*\* = P<0.01, \*\*\* = P<0.001, empty field = P>0.05, --- not applicable
