# Supplementary material for: Bacterial Community Composition and Extracellular Enzyme Activity in Temperate Streambed Sediment during Drying and Rewetting
Source: PubMed Central journal article supplement (PMC3873959; doi:10.1371/journal.pone.0083365), 2013-12-27
Supplement: pone.0083365.s005.pdf [file pone.0083365.s005.pdf]

**Table S5.** Significant differences between extracellular enzyme activities with respect to desiccation time (weeks) and treatment (fast, intermediate and slow desiccation).

|                   | Week | Fast |     |     |     |     | Intermediate |     |     |     |     | Slow |     |     |     |     |
|-------------------|------|------|-----|-----|-----|-----|--------------|-----|-----|-----|-----|------|-----|-----|-----|-----|
|                   |      | 0    | 2   | 4   | 8   | 13  | 0            | 2   | 4   | 8   | 13  | 0    | 2   | 4   | 8   | 13  |
| Alpha-glucosidase | 0    | ---  |     | *   |     |     | ---          |     | *   | *   |     | ---  |     | *   |     |     |
|                   | 2    |      | --- | *   | *   |     |              | --- |     |     |     |      | --- |     |     |     |
|                   | 4    | *    | *   | --- |     |     | *            |     | --- |     |     | *    |     | --- |     |     |
|                   | 8    |      | *   |     | --- | *   | *            |     |     | --- |     |      |     |     | --- |     |
|                   | 13   |      |     |     | *   | --- |              |     |     |     | --- |      |     |     |     | --- |
| Beta-glucosidase  | 0    | ---  |     |     |     |     | ---          |     |     |     |     | ---  |     |     |     |     |
|                   | 2    |      | --- | *   | *   | *   |              | --- |     |     |     |      | --- |     |     |     |
|                   | 4    |      | *   | --- |     |     |              |     | --- |     |     |      |     | --- |     |     |
|                   | 8    |      | *   |     | --- |     |              |     |     | --- |     |      |     | --- |     |     |
|                   | 13   |      | *   |     |     | --- |              |     |     |     | --- |      |     |     |     | --- |
| Beta-xylosidase   | 0    | ---  |     |     |     |     | ---          |     |     |     |     | ---  | *   |     | *   | *   |
|                   | 2    |      | --- |     | *   |     |              | --- | *   | *   | *   | *    | --- | *   | *   | *   |
|                   | 4    |      |     | --- |     |     |              | *   | --- |     |     |      | *   | --- | *   | *   |
|                   | 8    |      | *   |     | --- |     |              | *   |     | --- |     | *    | *   | *   | --- |     |
|                   | 13   |      |     |     |     | --- |              | *   |     |     | --- | *    | *   | *   |     | --- |
| Phosphatase       | 0    | ---  |     |     |     |     | ---          |     |     |     |     | ---  |     |     |     |     |
|                   | 2    |      | --- | *   | *   |     |              | --- | *   |     | *   |      | --- | *   |     |     |
|                   | 4    |      | *   | --- |     | *   |              | *   | --- | *   |     |      | *   | --- |     | *   |
|                   | 8    |      | *   |     | --- |     |              |     | *   | --- |     |      |     |     | --- |     |
|                   | 13   |      |     | *   |     | --- |              | *   |     |     | --- |      |     | *   |     | --- |
| Aminopeptidase    | 0    | ---  |     | *   | *   | *   | ---          |     | *   | *   | *   | ---  | *   | *   |     |     |
|                   | 2    |      | --- | *   |     |     |              | --- |     |     |     | *    | --- | *   |     |     |
|                   | 4    | *    | *   | --- |     |     | *            |     | --- |     |     | *    | *   | --- | *   |     |
|                   | 8    | *    |     |     | --- | *   | *            |     |     | --- |     |      |     | *   | --- | *   |
|                   | 13   | *    |     |     | *   | --- | *            |     |     |     | --- |      |     |     | *   | --- |

ANOVA, \* = P<0.05, \*\* = P<0.01, \*\*\* = P<0.001, empty field = P>0.05, --- not applicable
