# Supplementary material for: Bacterial Community Composition and Extracellular Enzyme Activity in Temperate Streambed Sediment during Drying and Rewetting
Source: PubMed Central journal article supplement (PMC3873959; doi:10.1371/journal.pone.0083365), 2013-12-27
Supplement: pone.0083365.s006.pdf [file pone.0083365.s006.pdf]

**Table S6.** Abundances of prokaryotes in Breitenbach streambed sediments experimentally rewetted after 13 weeks of desiccation: ranges.

| Treatment     | Days | Prokaryotes<br>(10 <sup>9</sup> cells mL <sup>-1</sup> ) | <i>Bacteria</i><br>(10 <sup>9</sup> cells mL <sup>-1</sup> ) | <i>Alphaproteo-<br/>bacteria</i><br>(10 <sup>7</sup> cells mL <sup>-1</sup> ) | <i>Betaproteo-<br/>bacteria</i><br>(10 <sup>7</sup> cells mL <sup>-1</sup> ) | <i>Gamma</i> proteo-<br><i>bacteria</i><br>(10 <sup>7</sup> cells mL <sup>-1</sup> ) | <i>Bacteroidetes</i><br>(10 <sup>7</sup> cells mL <sup>-1</sup> ) | <i>Actinobacteria</i><br>(10 <sup>7</sup> cells mL <sup>-1</sup> ) | <i>Firmicutes</i><br>(10 <sup>7</sup> cells mL <sup>-1</sup> ) |
|---------------|------|----------------------------------------------------------|--------------------------------------------------------------|-------------------------------------------------------------------------------|------------------------------------------------------------------------------|--------------------------------------------------------------------------------------|-------------------------------------------------------------------|--------------------------------------------------------------------|----------------------------------------------------------------|
| dry           | 0    | 0.6-7.0                                                  | 0.7-2.7                                                      | 13.2-44.9*                                                                    | 4.5-22.6                                                                     | 0.0-7.4                                                                              | 0.8-9.4                                                           | 3.8-37.4                                                           | 0.0-2.0                                                        |
| with cells    | 1    | 2.8-5.6                                                  | 0.4-2.5                                                      | 13.2-43.4                                                                     | 27.1-68.4*                                                                   | 10.1-19.5*                                                                           | 6.0-30.5                                                          | 8.0-47.2                                                           | 0.8-37.8                                                       |
|               | 2    | 1.1-4.5                                                  | 0.7-1.2                                                      | 19.0-62.7                                                                     | 109.5-114.9**                                                                | 2.0-30.9                                                                             | 3.3-42.0                                                          | 1.5-9.0*                                                           | 1.8-9.9                                                        |
|               | 3    | 2.8-4.7                                                  | 0.3-2.7                                                      | 14.2-75.4                                                                     | 23.4-268.5*                                                                  | 6.7-30.3*                                                                            | 7.3-82.3*                                                         | 2.7-17.5                                                           | 1.5-5.7                                                        |
|               | 6    | 2.7-7.8                                                  | 0.0-5.1                                                      | 12.3-44.7                                                                     | 152.2-398.9                                                                  | 10.3-44.1                                                                            | 0.4-18.2                                                          | 4.3-24.1                                                           | 3.3-9.0                                                        |
|               | 10   | 0.6-1.7*                                                 | 0.6-5.9                                                      | 87.5-124.1*                                                                   | 22.0-268.8                                                                   | 3.6-19.0                                                                             | 8.5-22.5*                                                         | 9.5-18.2                                                           | 1.3-13.8                                                       |
|               | 14   | 6.8-8.5*                                                 | 1.7-3.8                                                      | 40.3-183.8                                                                    | 56.7-183.8*                                                                  | 4.3-31.5                                                                             | 2.9-17.1                                                          | 1.5-9.3                                                            | 10.6-15.1*                                                     |
| without cells | 1    | 1.5-4.9                                                  | 0.9-2.2                                                      | 26.6-41.7                                                                     | 0.6-13.2 *                                                                   | 0.6-13.2                                                                             | 4.3-12.1                                                          | 4.3-12.1                                                           | 2.5-14.8*                                                      |
|               | 2    | 4.0-1.1                                                  | 0.3-0.9                                                      | 13.9-100.7                                                                    | 19.4-69.4                                                                    | 1.4-31.8                                                                             | 0.3-9.6                                                           | 1.4-45.4                                                           | 6.3-13.3*                                                      |
|               | 3    | 1.9-5.9                                                  | 1.1-1.3                                                      | 16.3-126.9                                                                    | 72.6-293.4                                                                   | 49.4-23.5*                                                                           | 2.5-24.3                                                          | 7.0-9.4                                                            | 8.0-17.3                                                       |
|               | 6    | 0.7-4.0                                                  | 0.1-3.7                                                      | 5.2-40.8                                                                      | 26.4-115.1                                                                   | 1.1-112.1                                                                            | 5.3-44.7*                                                         | 6.5-34.8                                                           | 2.0-18.1                                                       |
|               | 10   | 4.8-8.9                                                  | 0.2-1.6                                                      | 9.2-55.8                                                                      | 27.7-58.8*                                                                   | 1.4-103.3                                                                            | 6.4-22.5                                                          | 2.0-7.7*                                                           | 2.9-11.4                                                       |
|               | 14   | 3.3-6.7                                                  | 0.4-1.4                                                      | 31.7-97.3                                                                     | 31.5-80.7*                                                                   | 5.3-9.6*                                                                             | 7.0-9.8 *                                                         | 7.3-5.0*                                                           | 5.8-8.0                                                        |

The abundance of prokaryotes was determined after SYBR Green staining whereas the abundances of different taxonomic groups were determined via CARD-FISH (n=4). The asterisks indicate significant differences between dry sediment from day 0 used for rewetting and the treatment samples (ANOVA, \* = P<0.05, \*\* = P< 0.01).
