# Supplementary material for: Bacterial Community Composition and Extracellular Enzyme Activity in Temperate Streambed Sediment during Drying and Rewetting
Source: PubMed Central journal article supplement (PMC3873959; doi:10.1371/journal.pone.0083365), 2013-12-27
Supplement: pone.0083365.s007.pdf [file pone.0083365.s007.pdf]

**Table S7.** Extracellular enzyme activities in Breitenbach streambed sediments experimentally rewetted for 2 weeks after 13 weeks of desiccation.

| Time [h] | Alpha-glucosidase | Beta-glucosidase | Beta-xylosidase | Phosphatase | Aminopeptidase |
|----------|-------------------|------------------|-----------------|-------------|----------------|
| 0        | 0.94±0.05         | 11.1±0.9         | 4.8±0.7         | 33.5±3.2    | 2.8±0.4        |
| 1        | 1.7±0.5           | 10.8±0.9         | 3.8±0.3         | 38.4±3.1    | 4.6±0.2        |
| 24       | 1.1±0.2           | 7.2±0.9*         | 2.1±0.1         | 36.8±3.2    | 11.0±1.0       |
| 48       | 1.8±0.9           | 11.6±0.9**       | 3.0±0.3         | 38.1±1.2    | 32.9±1.3       |
| 72       | 2.1±0.8           | 12.9±1.4         | 3.6±0.6         | 26.7±7.7    | 47.9±1.9       |
| 144      | 4.4±1.9           | 14.5±1.4         | 5.1±2.3         | 4.6±3.3*    | 89.6±4.2       |
| 240      | 12.2±2.3**        | 33.6±0.7***      | 13.7±1.4*       | 2.3±1.0*    | 126±18*        |
| 336      | 15.2±3.3**        | 38.7±2.0***      | 16.8±1.4**      | 6.2±4.9*    | 200±14**       |

The measurements of extracellular enzyme activities were performed immediately after rewetting (day 0) and after 1, 2, 3, 6, 10, and 14 days of perfusion with filtered and boiled Breitenbach stream water. Means ( $\text{nmol mL}^{-1} \text{ h}^{-1}$ ) with SD are given ( $n=3$ ). The asterisks indicate significant differences between the treatment samples and dry sediment from day 0 used for rewetting (t-test, \* =  $P<0.05$ , \*\* =  $P<0.01$ , \*\*\* =  $P<0.001$ ).
